# Supplementary material for: Significance of endometrial thickness change after human chorionic gonadotrophin triggering in modified natural cycles for frozen-thawed embryo transfer
Source: PubMed Central journal article supplement — Ann Transl Med. 2020 Dec;8(23):1590. doi: 10.21037/atm-20-1459 (PMC7791260; doi:10.21037/atm-20-1459), 2020-12
Supplement: atm-08-23-1590-supplementary.pdf [file atm-08-23-1590-supplementary.pdf]

A

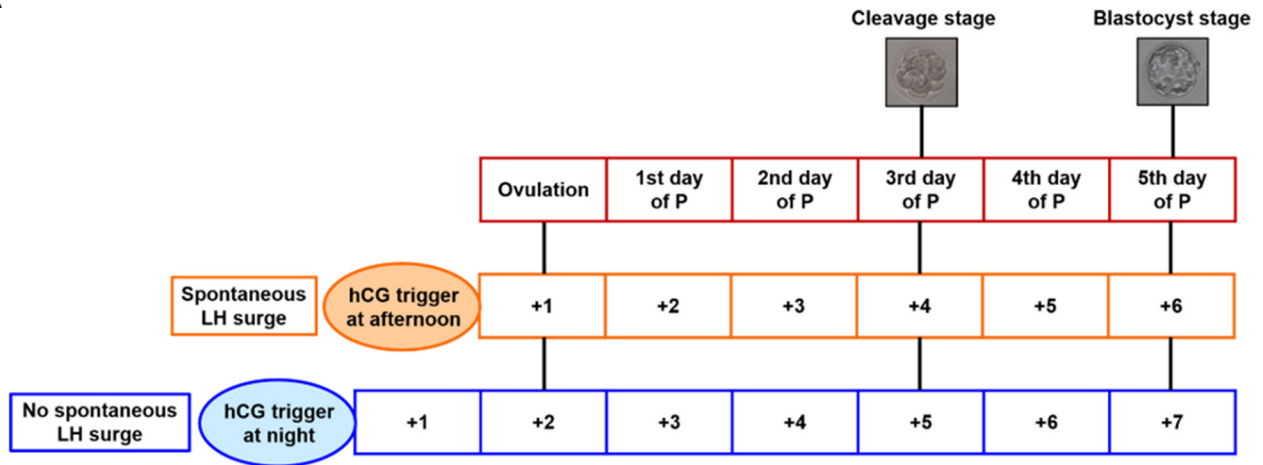

B

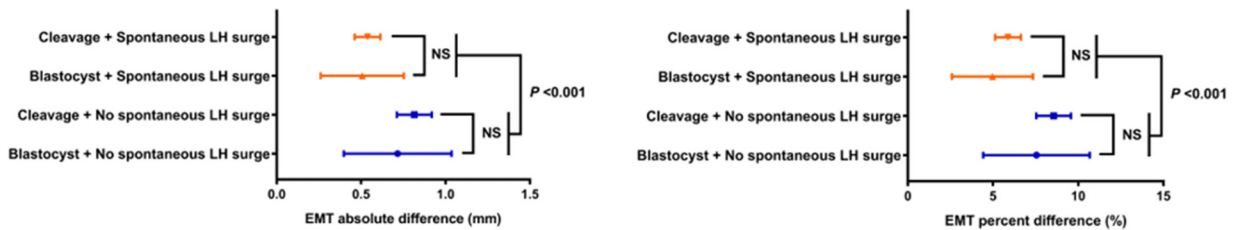

**Figure S1** Endometrial thickness (EMT) change after human chorionic gonadotrophin (hCG) triggering in modified natural cycles for frozen-thawed embryo transfer (FET). (A) The scheme of FET timing; (B,C) comparison of absolute and percent changes of post-trigger EMT in cleavage- and blastocyst-stage embryo transfer cycles with or without spontaneous luteinizing hormone (LH) surge. The error bars show the 95% CIs. P, progesterone; NS, no significance.

**Table S1** Multiple regression analysis of possible determinants for live birth.

|                                                    | Adjusted OR (95% CI) | Wals   | P-value |
|----------------------------------------------------|----------------------|--------|---------|
| <b>Maternal age (years)</b>                        |                      |        |         |
| <30                                                | Reference            |        |         |
| 30–34                                              | 0.86 (0.72–1.04)     | 2.481  | 0.115   |
| 35–37                                              | 0.62 (0.47–0.80)     | 12.734 | <0.001  |
| 38–40                                              | 0.56 (0.39–0.79)     | 11.095 | 0.001   |
| ≥41                                                | 0.11 (0.06–0.21)     | 52.252 | <0.001  |
| <b>Maternal BMI (kg/m<sup>2</sup>)</b>             |                      |        |         |
| <18.5                                              | 0.86 (0.68–1.10)     | 1.457  | 0.227   |
| 18.5–24.9                                          | Reference            |        |         |
| 25.0–29.9                                          | 1.05 (0.77–1.44)     | 0.108  | 0.742   |
| ≥30                                                | 0.46 (0.22–0.99)     | 3.868  | 0.049   |
| Gravidity (≥1 vs. 0)                               | 0.95 (0.79–1.13)     | 0.355  | 0.551   |
| Parity (≥1 vs. 0)                                  | 1.08 (0.79–1.48)     | 0.239  | 0.625   |
| <b>Duration of infertility (years)</b>             |                      |        |         |
| <3                                                 | Reference            |        |         |
| 3–6                                                | 0.98 (0.82–1.17)     | 0.045  | 0.832   |
| >6                                                 | 0.77 (0.60–0.99)     | 4.264  | 0.039   |
| <b>Infertility diagnosis</b>                       |                      |        |         |
| Male factor                                        | Reference            |        |         |
| Tubal factor                                       | 0.68 (0.51–0.91)     | 6.855  | 0.009   |
| Other                                              | 0.78 (0.49–1.23)     | 1.171  | 0.279   |
| Unexplained                                        | 0.87 (0.59–1.28)     | 0.478  | 0.489   |
| Combined                                           | 0.74 (0.56–0.99)     | 4.208  | 0.040   |
| <b>Ovarian stimulation protocol</b>                |                      |        |         |
| GnRH antagonist                                    | Reference            |        |         |
| GnRH agonist short                                 | 0.68 (0.37–1.25)     | 1.513  | 0.219   |
| Mild stimulation                                   | 0.86 (0.47–1.54)     | 0.272  | 0.602   |
| Progestin-primed ovarian stimulation               | 1.05 (0.57–1.92)     | 0.022  | 0.882   |
| <b>Fertilization method</b>                        |                      |        |         |
| IVF                                                | Reference            |        |         |
| ICSI                                               | 0.86 (0.68–1.09)     | 1.614  | 0.204   |
| IVF + ICSI                                         | 0.85 (0.64–1.12)     | 1.316  | 0.251   |
| Year of treatment (after vs. before 2013)          | 0.97 (0.80–1.16)     | 0.140  | 0.708   |
| <b>EMT on trigger day (mm)</b>                     |                      |        |         |
| <8                                                 | 0.69 (0.47–1.01)     | 3.565  | 0.059   |
| 8–13.9                                             | Reference            |        |         |
| ≥14                                                | 1.20 (0.90–1.61)     | 1.555  | 0.212   |
| <b>Post-trigger EMT percent difference</b>         |                      |        |         |
| >5% decrease                                       | 0.88 (0.69–1.12)     | 1.049  | 0.306   |
| ±5% plateau                                        | Reference            |        |         |
| >5% increase                                       | 1.05 (0.88–1.25)     | 0.244  | 0.621   |
| Spontaneous LH surge (yes vs. no)                  | 0.96 (0.82–1.13)     | 0.250  | 0.617   |
| No. of embryos transferred (double vs. single)     | 2.22 (1.69–2.93)     | 32.494 | <0.001  |
| Embryo stage at transfer (blastocyst vs. cleavage) | 1.63 (1.22–2.19)     | 10.607 | 0.001   |
| Transfer of ≥1 top-quality embryo (yes vs. no)     | 1.21 (1.01–1.46)     | 4.022  | 0.045   |

OR, odds ratio; CI, confidence interval; BMI, body mass index; GnRH, gonadotropin-releasing hormone; IVF, *in vitro* fertilization; ICSI, intracytoplasmic sperm injection; EMT, endometrial thickness; LH, luteinizing hormone.
